# Supplementary material for: Green Synthesis of Silver Nanoparticles Using the Cell-Free Supernatant of Haematococcus pluvialis Culture
Source: MDPI journal article supplement (doi:10.3390/ma17010187), 2023-12-29
Supplement: s1 [file s1]

# Green synthesis of silver nanoparticles using the cell-free supernatant of *Haematococcus pluvialis* culture

Maria G. Savvidou<sup>1,2†</sup>, Evgenia Kontari<sup>1†</sup>, Styliani Kalantzi<sup>1</sup>, Diomi Mamma<sup>1\*</sup>

<sup>1</sup> Biotechnology Laboratory, School of Chemical Engineering, National Technical University of Athens, 9 Iroon Polytechniou Str, Zografou Campus, 15700, Athens Greece

<sup>2</sup> Current affiliation: Department of Biomedical Engineering, Tufts University, Medford, 02155, MA, USA

\*Corresponding author, Tel: +30 210 7723160, Fax: +30 210 7723161,

e-mail address: dmamma@chemeng.ntua.gr

† These authors contributed equally to this paper

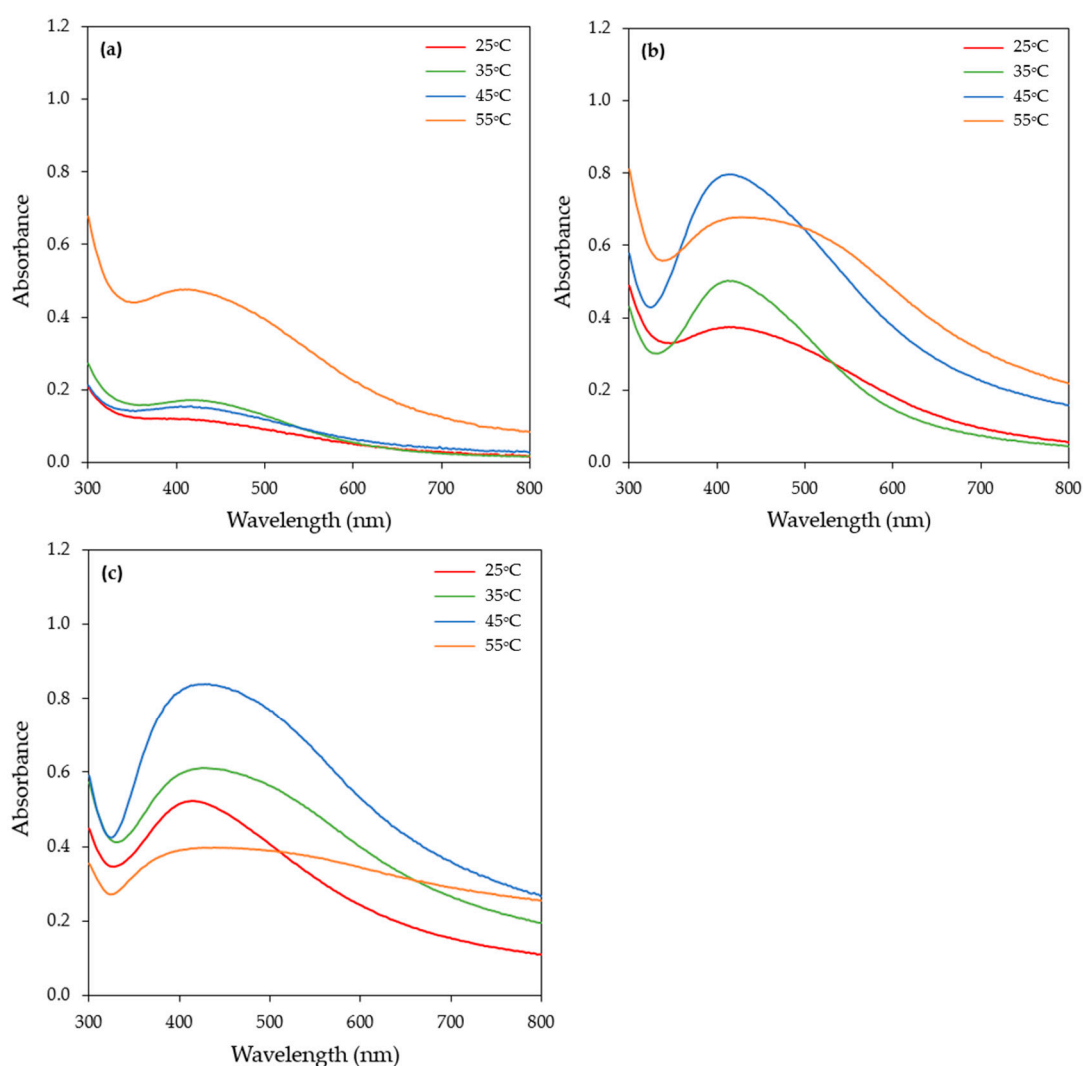

**Supplementary Figure S1.** UV–visible absorption spectra of AgNPs biosynthesized by the CFS of *H. pluvialis* culture at different temperatures and for reaction time of (a) 0.25 h, (b) 3 h, (c) 6h. (Conditions: illumination, pH=8.0, AgNO<sub>3</sub> concentration: 1mM, AgNO<sub>3</sub> aqueous solution to CFS ratio: 90:10 (v/v), stirring: 180 rpm for 15 min followed by stirring at 80 rpm)

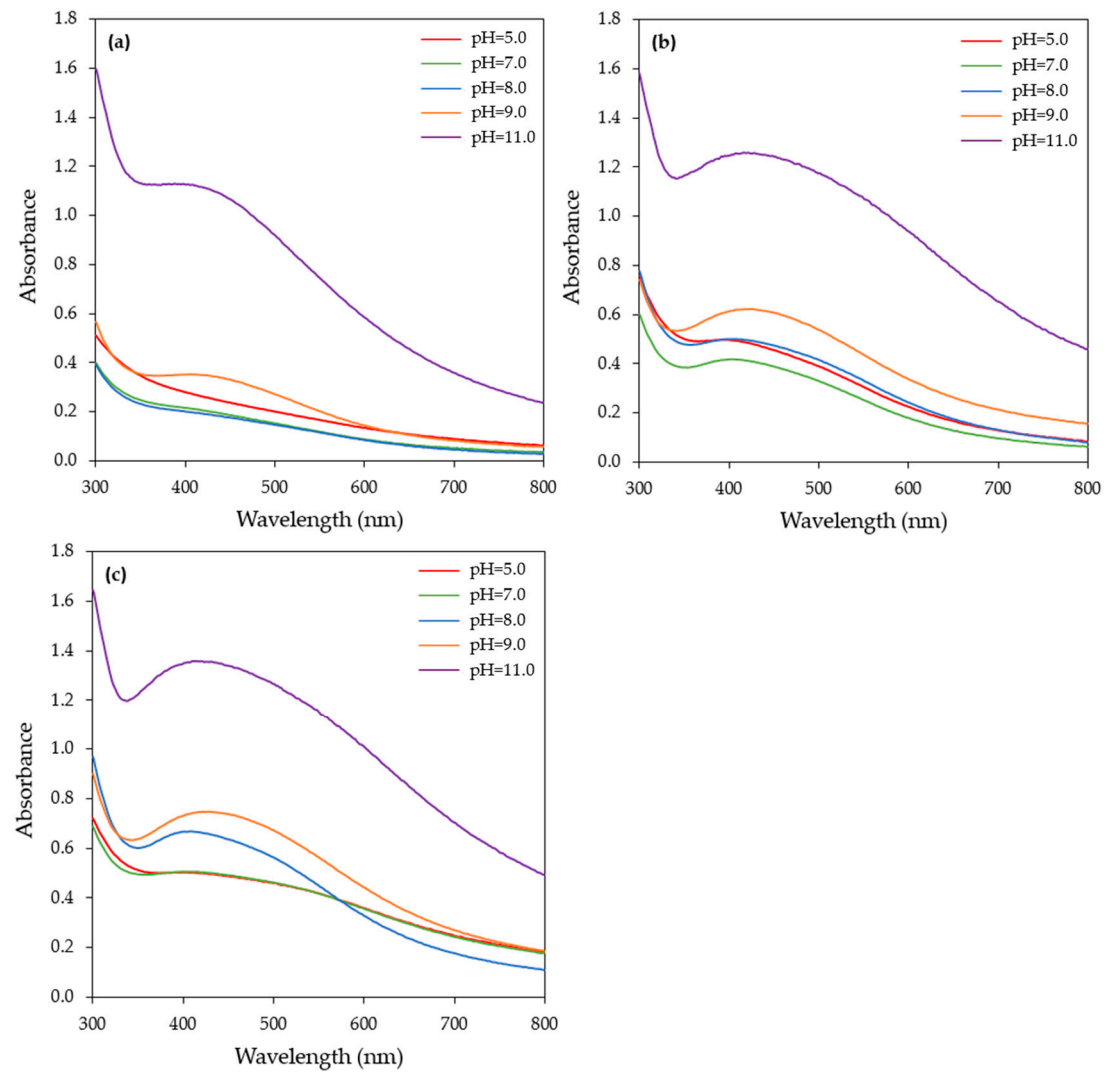

**Supplementary Figure S2.** UV–visible absorption spectra of AgNPs biosynthesized by the CFS of *H. pluvialis* culture at various pHs and for reaction time of (a) 0.25 h, (b) 3 h, and (c) 6 h. (Conditions: illumination,  $T=45^{\circ}\text{C}$ ,  $\text{AgNO}_3$  concentration: 1mM,  $\text{AgNO}_3$  aqueous solution to CFS ratio: 90:10 (v/v), stirring: 180 rpm for 15 min followed by stirring at 80 rpm)

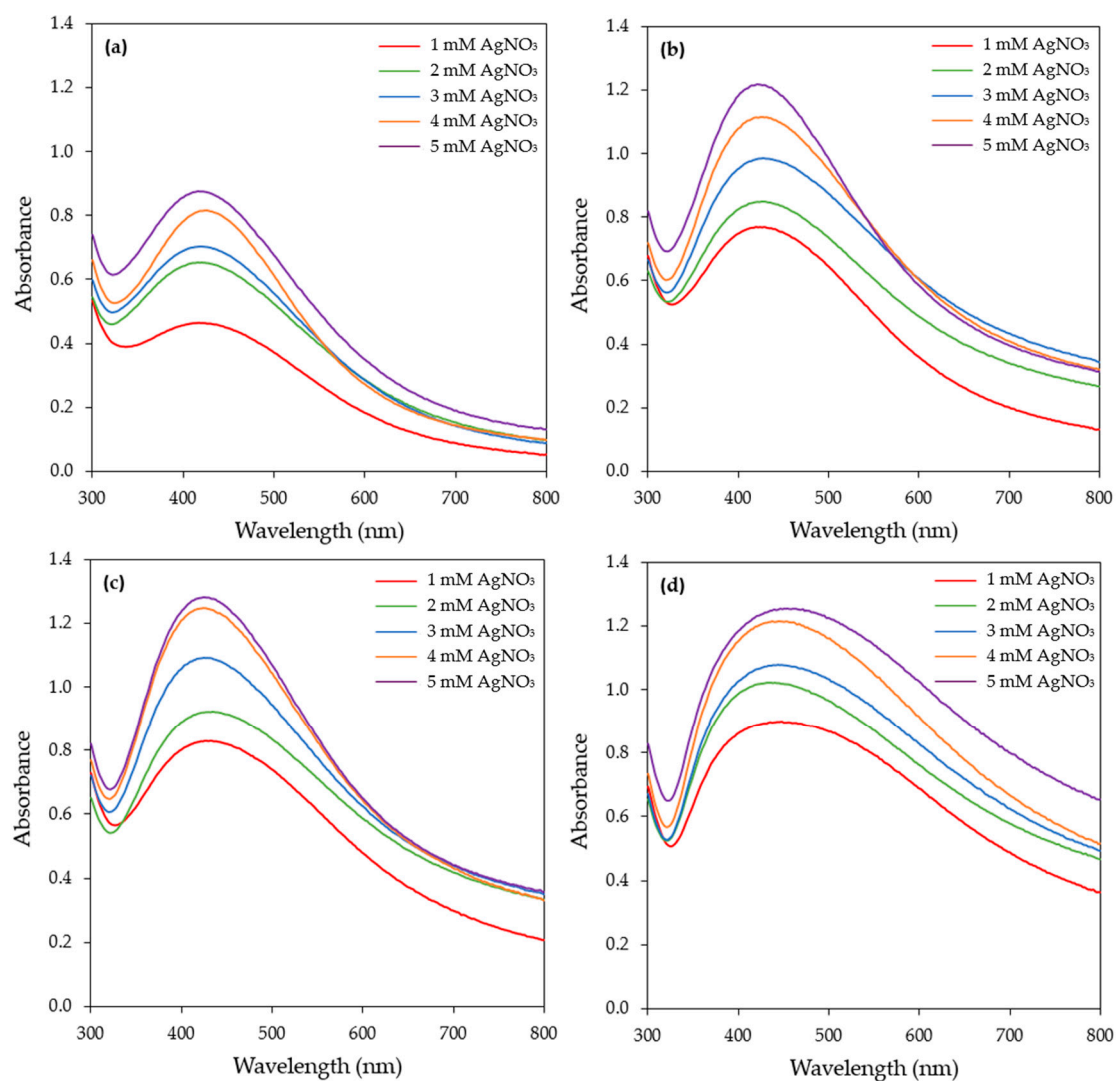

**Supplementary Figure S3.** UV–visible absorption spectra of AgNPs biosynthesized by the CFS of *H. pluvialis* culture at various  $\text{AgNO}_3$  concentrations (1-5 mM) and for reaction time of (a) 1 h, (b) 3 h, (c) 6 h, and (d) 24 h. (Conditions: illumination,  $T=45^\circ\text{C}$ ,  $\text{pH}=11.0$ ,  $\text{AgNO}_3$  aqueous solution to CFS ratio: 90:10 (v/v), stirring: 180 rpm for 15 min followed by stirring at 80 rpm)

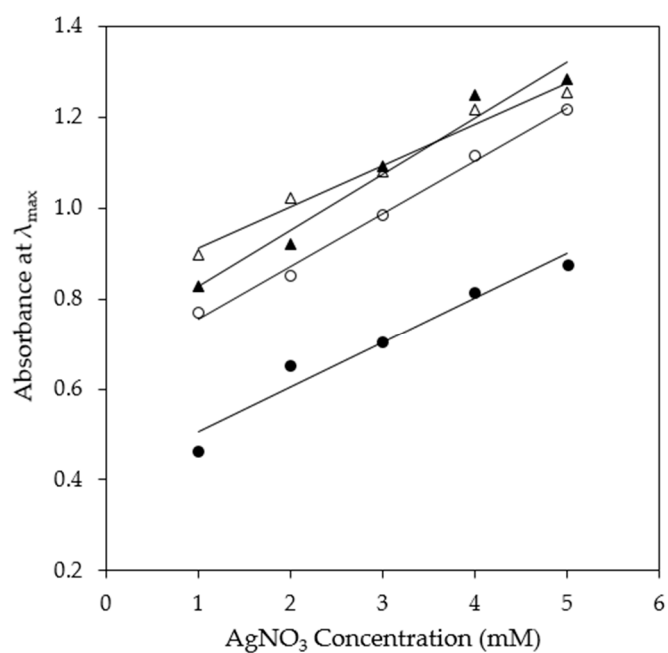

**Supplementary Figure S4.** Linear relationship between AgNO<sub>3</sub> concentration and absorbance at  $\lambda_{max}$  (420 nm). Symbols:

- (●) 1h reaction time  $ABS (at \lambda_{max}) = 0,0987 * C_{AgNO_3} + 0,4065$ , ( $R^2=0.96$ ,  $p=0.0042$ );
- (○) 3 h reaction time  $ABS (at \lambda_{max}) = 0,1162 * C_{AgNO_3} + 0,6392$ , ( $R^2=0.99$ ,  $p=0.0002$ );
- (▲) 6 h reaction time  $ABS (at \lambda_{max}) = 0,1235 * C_{AgNO_3} + 0,7043$ , ( $R^2=0.97$ ,  $p=0.0026$ );
- (△) 24 h reaction time  $ABS (at \lambda_{max}) = 0,0904 * C_{AgNO_3} + 0,8228$ , ( $R^2=0.97$ ,  $p=0.0018$ ).

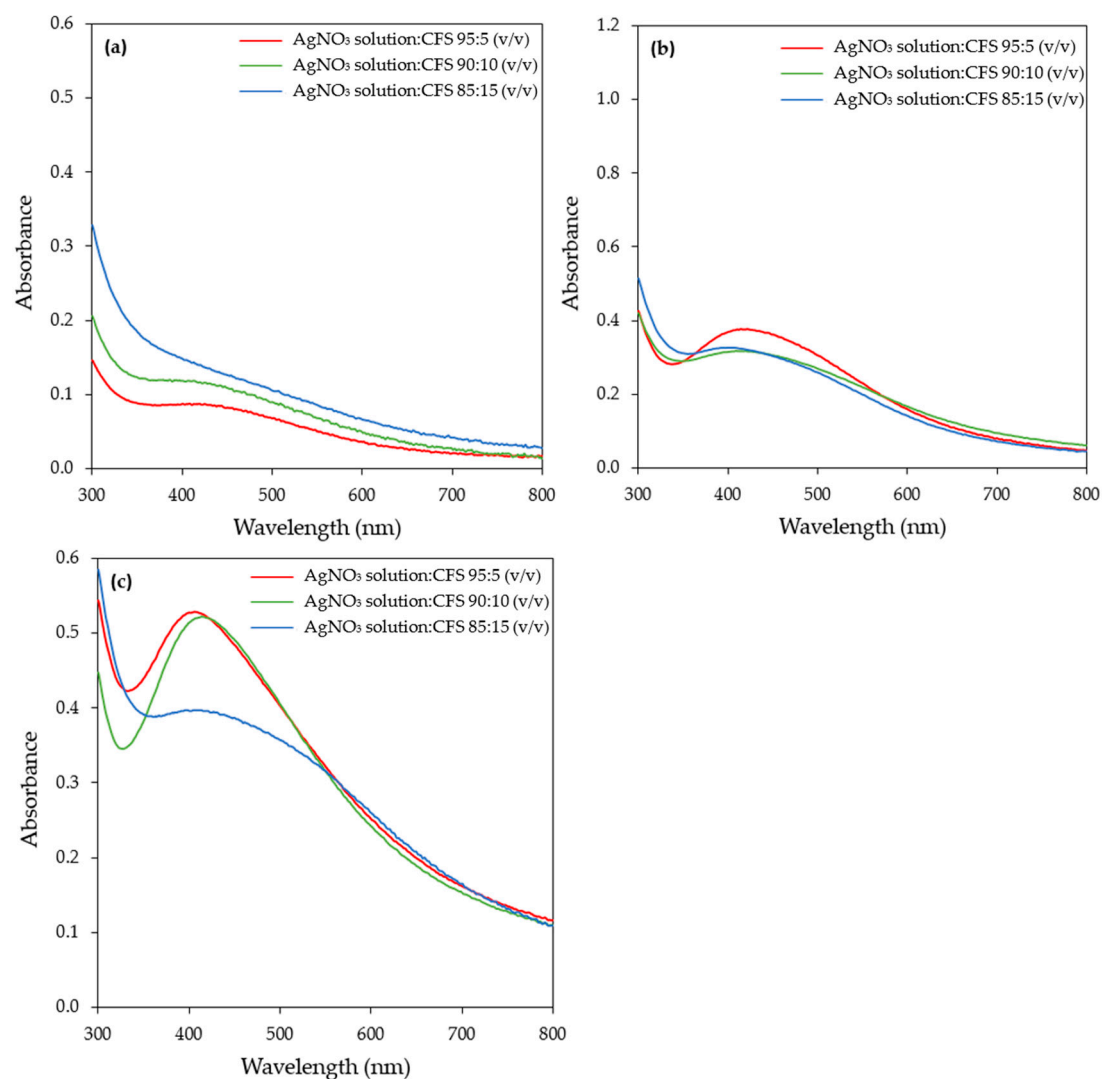

**Supplementary Figure S5.** UV–visible absorption spectra of AgNPs biosynthesized by the CFS of *H. pluvialis* culture at different  $\text{AgNO}_3$  aqueous solution to CFS ratios and for reaction time of (a) 0.25 h, (b) 3 h, and (c) 6 h. (Conditions: illumination,  $T=45^\circ\text{C}$ ,  $\text{pH}=11.0$ ,  $\text{AgNO}_3$  concentration: 1mM, stirring: 180 rpm for 15 min followed by stirring at 80 rpm).

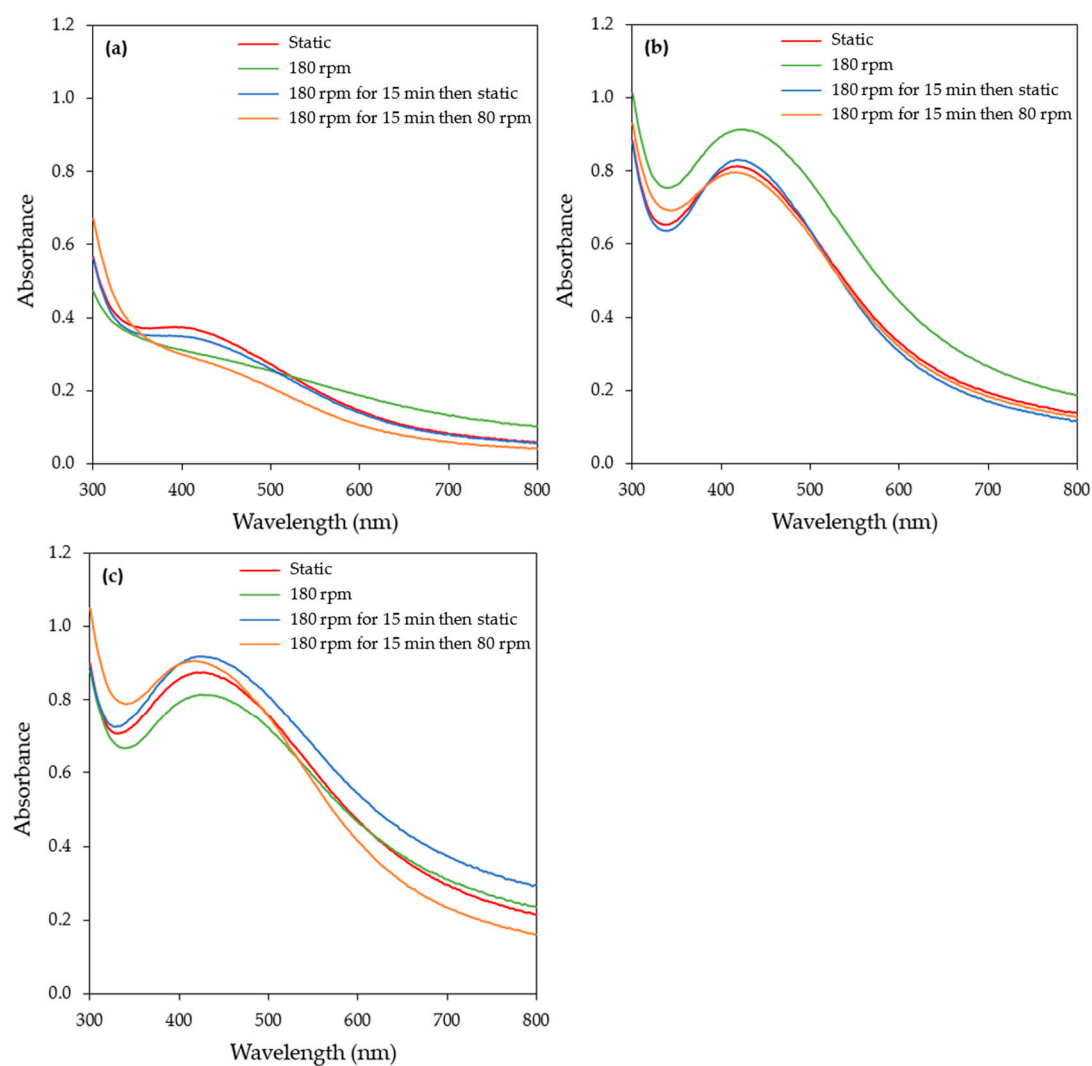

**Supplementary Figure S6.** UV–visible absorption spectra of AgNPs biosynthesized by the CFS of *H. pluvialis* culture at various stirring conditions and for reaction time of (a) 0.25 h, (b) 3 h, and (c) 6 h. (Conditions: illumination, T=45°C, pH=11.0, AgNO<sub>3</sub> concentration: 1mM, AgNO<sub>3</sub> aqueous solution to CFS ratio: 90:10 (v/v)).

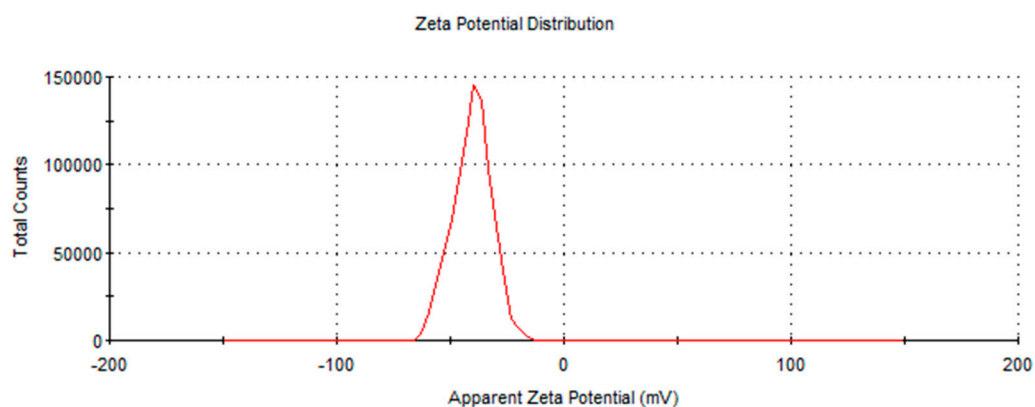

**Supplementary Figure S7.** Zeta potential of AgNPs biosynthesized by the CFS of *H. pluvialis* culture under optimal conditions.
